# Supplementary material
Source: PubMed Central journal article supplement (PMC6357307)
Supplement: ajtr0011-0160-f9.pdf [file ajtr0011-0160-f9.pdf]

hsa\_circ\_0002360 in LAC

**Table S1.** Primers for circRNAs, miRNA, and mRNA

| Gene             | Primer sequences                                                                                      | PCR product (bp) |
|------------------|-------------------------------------------------------------------------------------------------------|------------------|
| hsa_circ_0000264 | GGATAATAATGCCTGGACGTTC<br>ATTCCTCTCCACAGGGT                                                           | 137              |
| hsa_circ_0039161 | TCATCTTACCCAGGTGTC<br>TACTGCTTGTGGTCTCCG                                                              | 80               |
| hsa_circ_0002360 | CTCAGAGTCAGATGCAGGG<br>TGATGGCTCTGTGGTAGG                                                             | 90               |
| hsa_circ_0006276 | ATGTAAGACCTGTTGCCG<br>CCTGGGTATGACATTCTGACT                                                           | 127              |
| hsa_circ_0004062 | GATTCCCTGTACAATGGAT<br>GATGGACTCAAAGCGTTTCTC                                                          | 106              |
| hsa_circ_0004417 | GGAGAAGCCATCCAACCT<br>CTGGGCAGTCATTGGTTA                                                              | 107              |
| hsa_circ_0001320 | CATCCTCTCTATGGACATGGT<br>ACTGACACGGGAACCTTAGAA                                                        | 91               |
| hsa_circ_0004777 | AGAGAAGCTGTTGTCCAGTGA<br>GACATCCTTTGACATCTTTGGC                                                       | 80               |
| hsa-mir-3620-5p  | GTGGGCTGGGCTGGGC<br>AGTGCAGGGTCCGAGGTATT<br>RT: GTCGTATCCAGTGCAGGGTC<br>CGAGGTATTCGACTGGATACGACGGCCCA | 66               |
| PHF19            | AGTTTAAAAAGTGCCAGCTCAG<br>CACTGTCCATCTGGAGTCATAG                                                      | 117              |
| $\beta$ -actin   | CCCACTTCTCTAAGGAGAAT<br>TACACGAAAGCAATGCTATCAC                                                        | 77               |
| U6               | AGAGAAGATTAGCATGGCCCTG<br>ATCCAGTGCAGGGTCCGAGG                                                        | 66               |

**Table S2.** Clinical characteristics of the patients participated in RNA-seq analysis

| Patient No. | Age | Gender | Histologic differentiation | TNM stage | Smoking history |
|-------------|-----|--------|----------------------------|-----------|-----------------|
| Case 1      | 49  | Female | Moderately                 | T2aN1M1a  | No              |
| Case 2      | 71  | Male   | Moderately                 | T2aN1M1b  | No              |
| Case 3      | 58  | Male   | Moderately                 | T2aNOM1a  | Yes             |
| Case 4      | 72  | Female | Poorly-Moderately          | T2aN1M1a  | No              |
| Case 5      | 49  | Male   | Poorly-Moderately          | T2aNOM1a  | No              |
